# Supplementary material for: An exquisitely preserved in-ovo theropod dinosaur embryo sheds light on avian-like prehatching postures
Source: PubMed Central journal article supplement — iScience. 2021 Dec 21;25(1):103516. doi: 10.1016/j.isci.2021.103516 (PMC8786642; doi:10.1016/j.isci.2021.103516), 2021-12-21
Supplement: mmc1.pdf [file mmc1.pdf]

iScience, Volume 25

## Supplemental information

**An exquisitely preserved *in-ovo*  
theropod dinosaur embryo sheds light  
on avian-like prehatching postures**

**Lida Xing, Kecheng Niu, Waisum Ma, Darla K. Zelenitsky, Tzu-Ruei Yang, and Stephen L. Brusatte**

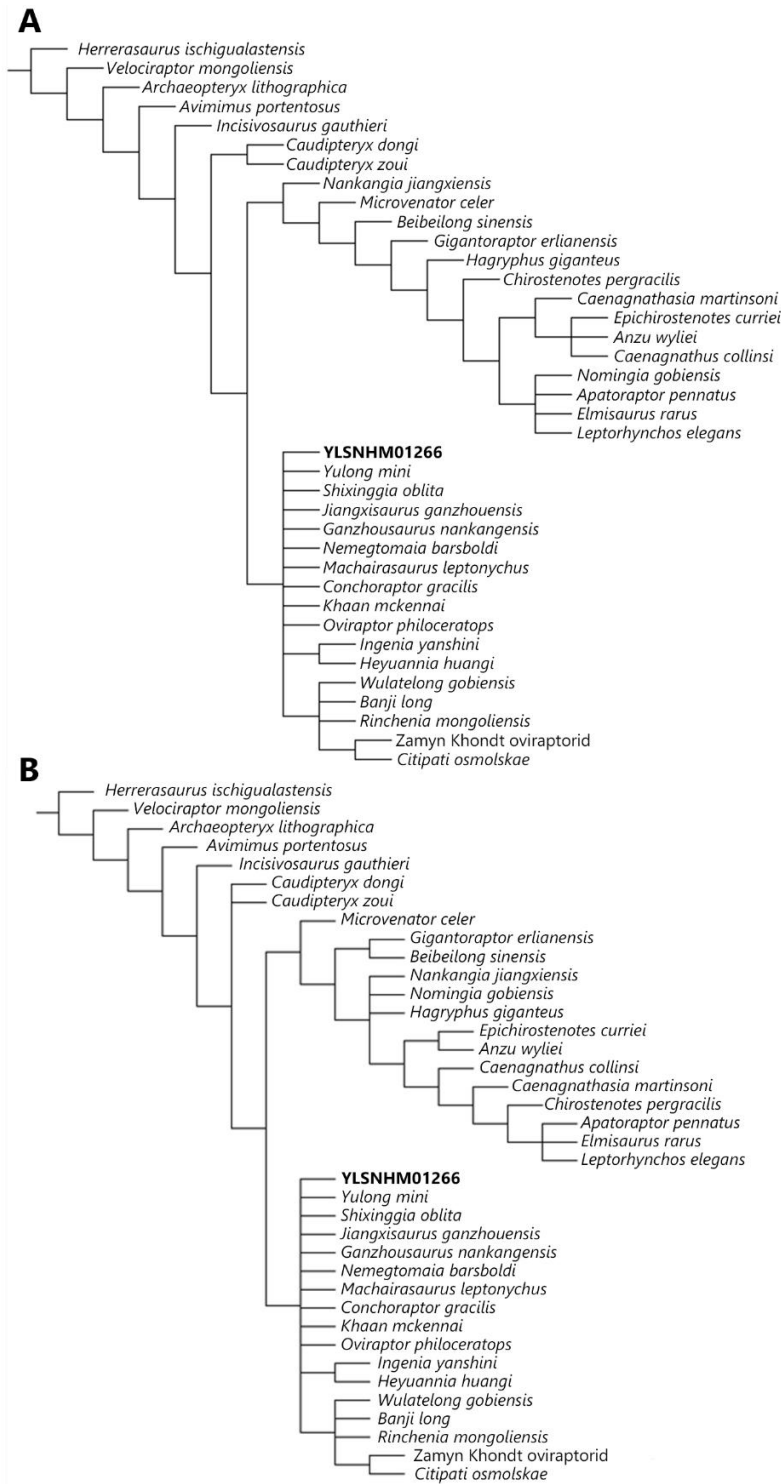

**Figure S1. Phylogenetic position of YLSNHM01266. Related to STAR Methods.** (A) Strict consensus tree of 72 most parsimonious trees, based on a phylogenetic analysis which all possible characters were coded (consistency index = 0.492, retention index = 0.661). (B) Strict consensus tree of 432 most parsimonious trees, based on a phylogenetic analysis which putative ontogenetically-variable characters were coded as '?' (consistency index = 0.495, retention index = 0.663).

**Table S1. Measurements of selected elements of YLSNHM01266. Related to Figure 1.**  
 Measurements are lengths unless otherwise stated. \*estimated measurements.

| Element                  | Measurement (cm) |
|--------------------------|------------------|
| Egg length               | 16.7             |
| Egg width                | 7.6              |
| Skull                    | 4.5              |
| Left scapula             | 3.2              |
| Left ulna                | 3.0              |
| Left radius              | 2.8              |
| Ilium length             | 4.2              |
| Ilium height             | 1.6              |
| Left femur               | 4.5              |
| Left tibia               | 5.4              |
| Left fibula              | 4.6              |
| Left metatarsal II       | 2.7*             |
| Left metatarsal III      | 2.8*             |
| Left metatarsal IV       | 2.6*             |
| Left pedal phalanx IV-1  | 0.8              |
| Right metatarsal II      | 2.5*             |
| Right pedal phalanx II-1 | 0.7              |
